# Supplementary material for: Classification and Clinical Diagnosis of Fibromyalgia Syndrome: Recommendations of Recent Evidence-Based Interdisciplinary Guidelines
Source: PubMed Central journal article supplement (PMC3860136; doi:10.1155/2013/528952), 2013-11-26
Supplement: 528952.f1.pdf [file 528952.f1.pdf]

1 Table 5: Fibromyalgia survey questionnaire [25]

2 **Symptom severity score (SSS)**

3 I. Using the following scale, indicate for each item the level of severity **over the past**  
4 **week** by checking the appropriate box.

5 0: No problem

6 1: Slight or mild problems; generally mild or intermittent

7 2: Moderate; considerable problems; often present and/or at a moderate level

8 3. Severe: continuous, life-disturbing problems

9

10 Fatigue  0  1  2  3

11 Trouble thinking or remembering  0  1  2  3

12 Waking up tired (unrefreshed)  0  1  2  3

13

---

14 II. During the **past 6 months** have you had any of the following symptoms?

15

16 Pain or cramps in lower abdomen:  Yes (1)  No (0)

17 Depression:  Yes (1)  No (0)

18 Headache :  Yes (1)  No (0)

19

---

20

21 **Widespread pain index (WPI)**

22 Please indicate below if you have had pain or tenderness over the past 7 days in  
 23 each of the areas listed below. Please make an X in the box if you have had pain or  
 24 tenderness. Be sure to mark both right side and left side separately

25

|                                                                                        |                                                                                       |                                                                                                             |
|----------------------------------------------------------------------------------------|---------------------------------------------------------------------------------------|-------------------------------------------------------------------------------------------------------------|
| <input type="checkbox"/> Shoulder, left<br><input type="checkbox"/> Shoulder, right    | <input type="checkbox"/> Upper leg, left<br><input type="checkbox"/> Upper leg, right | <input type="checkbox"/> Lower back<br><input type="checkbox"/> Upper back<br><input type="checkbox"/> Neck |
| <input type="checkbox"/> Hip, left<br><input type="checkbox"/> Hip, right              | <input type="checkbox"/> Lower leg, left<br><input type="checkbox"/> Lower leg, right |                                                                                                             |
| <input type="checkbox"/> Upper am, left<br><input type="checkbox"/> Upper arm, right   | <input type="checkbox"/> Jaw, left<br><input type="checkbox"/> Jaw, right             | <input type="checkbox"/> No pain in any of these areas                                                      |
| <input type="checkbox"/> Lower rarm, left<br><input type="checkbox"/> Lower arm, right | <input type="checkbox"/> Chest<br><input type="checkbox"/> Abdomen                    |                                                                                                             |

26

27 IV. Overall, were the symptoms listed in I - III above generally present for at **least 3**  
 28 **months?**  Yes  No

29 The criteria of the symptoms of FMS are met if > 7 pain sites in the WPI and the SSS  
 30 score is > 4 and IV is answered with “yes” [6].

31
